# Supplementary material for: Association of MTHFD Gene Polymorphisms and Maternal Smoking With Risk of Congenital Heart Disease: A Hospital-Based Case-Control Study
Source: Research Square preprint supplement (doi:10.21203/rs.3.rs-650881/v1), 2021-07-15
Supplement: Supplementary file 1 [file 013561736f9388af89390a90.docx]

**Table S2. Genotypes Frequencies of SNPs and *P* values of HWE test**

| SNPsGroup | | Genotype Frequencies | | | HWE test *P* |
| --- | --- | --- | --- | --- | --- |
| AA | AB | BB‡ |
| rs1950902 | Controls | 72(14.3%) | 242(48.0%) | 190(37.7%) | 0.719 |
|  | Case | 46(9.9%) | 200(43.1%) | 218(47.0%) |  |
| rs2236225 | Controls | 332(65.9%) | 152(30.2%) | 20(4.0%) | 0.620 |
|  | Case | 286(61.6%) | 158(34.1%) | 20(4.3%) |  |
| rs2236222 | Controls | 318(63.1%) | 164(32.5%) | 22(4.4%) | 0.883 |
|  | Case | 254(54.7%) | 166(35.8%) | 44(9.5%) |  |
| rs11849530 | Controls | 230(45.6%) | 206(40.9%) | 68(13.5%) | 0.047 |
|  | Case | 216(46.6%) | 176(37.9%) | 72(15.5%) |  |
| rs1256142 | Controls | 108(21.4%) | 246(48.8%) | 150(29.8%) | 0.703 |
|  | Case | 78(16.8%) | 256(55.2%) | 130(28.0%) |  |

Abbreviations: SNPs = single nucleotide polymorphisms; HWE = Hardy-Weinberg equilibrium.

‡ AA, homozygous wild-type;

AB, heterozygous variant;

BB, homozygous variant.

HWE was tested for the control group (significance level at *P* <0.01).
