# Supplementary material for: Association of MTHFD Gene Polymorphisms and Maternal Smoking With Risk of Congenital Heart Disease: A Hospital-Based Case-Control Study
Source: Research Square preprint supplement (doi:10.21203/rs.3.rs-650881/v1), 2021-07-15
Supplement: Supplementary file 2 [file f949e91eae8a8bbbf6ed86ad.docx]

**Table S1.** Classification of congenital heart diseases in cases

| **CHD classification** | **Cases** | |
| --- | --- | --- |
| **No.** | **%** |
| Conotruncal defects | 28 | 6.0 |
| Tetralogy of Follot | 26 | 5.6 |
| Complete transposition of great arteries | 2 | 0.4 |
| Septation defects | 360 | 77.6 |
| Atrial septal defect | 66 | 14.2 |
| Ventricular septal defect | 252 | 54.3 |
| Atrioventricular septal defect | 42 | 9.1 |
| Left ventricular outflow tract obstruction | 11 | 2.4 |
| Right ventricular outflow tract obstruction | 17 | 3.7 |
| Anomalous pulmonary venous return | 16 | 3.4 |
| Complex CHDs | 20 | 4.3 |
| Other CHDs | 12 | 2.6 |

Abbreviations: CHDs = congenital heart diseases
